# Supplementary material for: Learning a Markov Logic network for supervised gene regulatory network inference
Source: Springer Nature journal article supplement (doi:10.1186/1471-2105-14-273), 2013-09-12
Supplement: 12859_2012_6054_MOESM1_ESM.pdf [file 12859_2012_6054_MOESM1_ESM.pdf]

## Dataset

### Genes in set $\mathcal{G}_A$ : list of symbols

*ADRB2, ADM, ASF1B, AKT1, BARD1, BAX, BCL3, CXCL5, CEBPB, CITED2, CDKN2A, CDKN1A, CCNB1, CTH, CHST6, DDIT3, E2F2, EGFR, FEN1, FOXM1, GHR, GDF8, GADD45B, HBP1, HSPA1A, HMGA2, ITGA2, ID3, ID2, IL1A, IL1B, IER3, INHBA, KLF6, LCN2, MATN2, MMP1, ODC1, PHLDA1, PCNA, PSMA3, PPP1CC, PLK1, PAPP, PLCG1, PLAU, RAB6A, SLC3A2, SMTN, SLC1A3, SERPINE2, SPARC, TFDP1, TGIF1, TCF3, TK1, TMEM97, TIMP1, UPP1, VEGFA, VPREB1, VRK1, YAP1*

### Genes in set $\mathcal{G}_B$ : list of symbols

*AHNAK, AURKA, CASP1, CCNA1, CDKN2B, CDKN3, DLG7, E2F1, EPAS1, HSPA5, ITPR3, JAG1, MDK, MMP10, MMP13, MYBL2, NR2F2, PSMB8, RARRES3, RFC4, TNC, TNFSF10, TPT1, TYMS*
