# Supplementary material for: Learning a Markov Logic network for supervised gene regulatory network inference
Source: Springer Nature journal article supplement (doi:10.1186/1471-2105-14-273), 2013-09-12
Supplement: 12859_2012_6054_MOESM4_ESM.pdf [file 12859_2012_6054_MOESM4_ESM.pdf]

|                   | $C = 0.001$  | $C = 0.01$   | $C = 0.1$    | $C = 1$      | $C = 10$     | $C = 100$    | $C = 1000$   |
|-------------------|--------------|--------------|--------------|--------------|--------------|--------------|--------------|
| $\lambda = 50$    | <b>0.009</b> | <b>0.009</b> | <b>0.009</b> | 0.064        | 0.074        | 0.074        | 0.074        |
| $\lambda = 100$   | <b>0.007</b> | <b>0.007</b> | <b>0.007</b> | 0.057        | 0.065        | 0.065        | 0.065        |
| $\lambda = 500$   | <b>0.006</b> | <b>0.006</b> | <b>0.006</b> | 0.052        | 0.054        | 0.054        | 0.054        |
| $\lambda = 750$   | <b>0.005</b> | <b>0.005</b> | <b>0.005</b> | <b>0.045</b> | <b>0.046</b> | <b>0.046</b> | <b>0.046</b> |
| $\lambda = 1000$  | <b>0.006</b> | <b>0.006</b> | <b>0.006</b> | 0.055        | 0.056        | 0.056        | 0.056        |
| $\lambda = 5000$  | <b>0.006</b> | <b>0.006</b> | <b>0.006</b> | 0.056        | 0.056        | 0.056        | 0.056        |
| $\lambda = 10000$ | <b>0.007</b> | <b>0.007</b> | <b>0.007</b> | 0.061        | 0.062        | 0.062        | 0.062        |

Table 1: P-values of the non-parametric test based on Mann Whitney statistics to compare AUC-ROC obtained with bagged MLNs and bagged pairwise SVMs (pairwise sum). These values are given for a range of hyperparameter  $C$  for SVM and  $\lambda$  for MLN.

|                   | $C = 0.001$ | $C = 0.01$ | $C = 0.1$ | $C = 1$ | $C = 10$ | $C = 100$ | $C = 1000$ |
|-------------------|-------------|------------|-----------|---------|----------|-----------|------------|
| $\lambda = 50$    | 0.092       | 0.092      | 0.092     | 0.206   | 0.213    | 0.213     | 0.213      |
| $\lambda = 100$   | 0.074       | 0.074      | 0.074     | 0.179   | 0.183    | 0.183     | 0.183      |
| $\lambda = 500$   | 0.060       | 0.060      | 0.060     | 0.158   | 0.156    | 0.156     | 0.156      |
| $\lambda = 750$   | 0.052       | 0.052      | 0.052     | 0.141   | 0.138    | 0.138     | 0.138      |
| $\lambda = 1000$  | 0.065       | 0.065      | 0.065     | 0.167   | 0.164    | 0.164     | 0.164      |
| $\lambda = 5000$  | 0.065       | 0.065      | 0.065     | 0.169   | 0.165    | 0.165     | 0.165      |
| $\lambda = 10000$ | 0.069       | 0.069      | 0.069     | 0.180   | 0.176    | 0.176     | 0.176      |

Table 2: P-values of the non-parametric test based on Mann Whitney statistics to compare AUC-ROC obtained with bagged MLNs and bagged pairwise SVMs (sum). These values are given for a range of hyperparameter  $C$  for SVM and  $\lambda$  for MLN.
