# Supplementary material for: Learning a Markov Logic network for supervised gene regulatory network inference
Source: Springer Nature journal article supplement (doi:10.1186/1471-2105-14-273), 2013-09-12

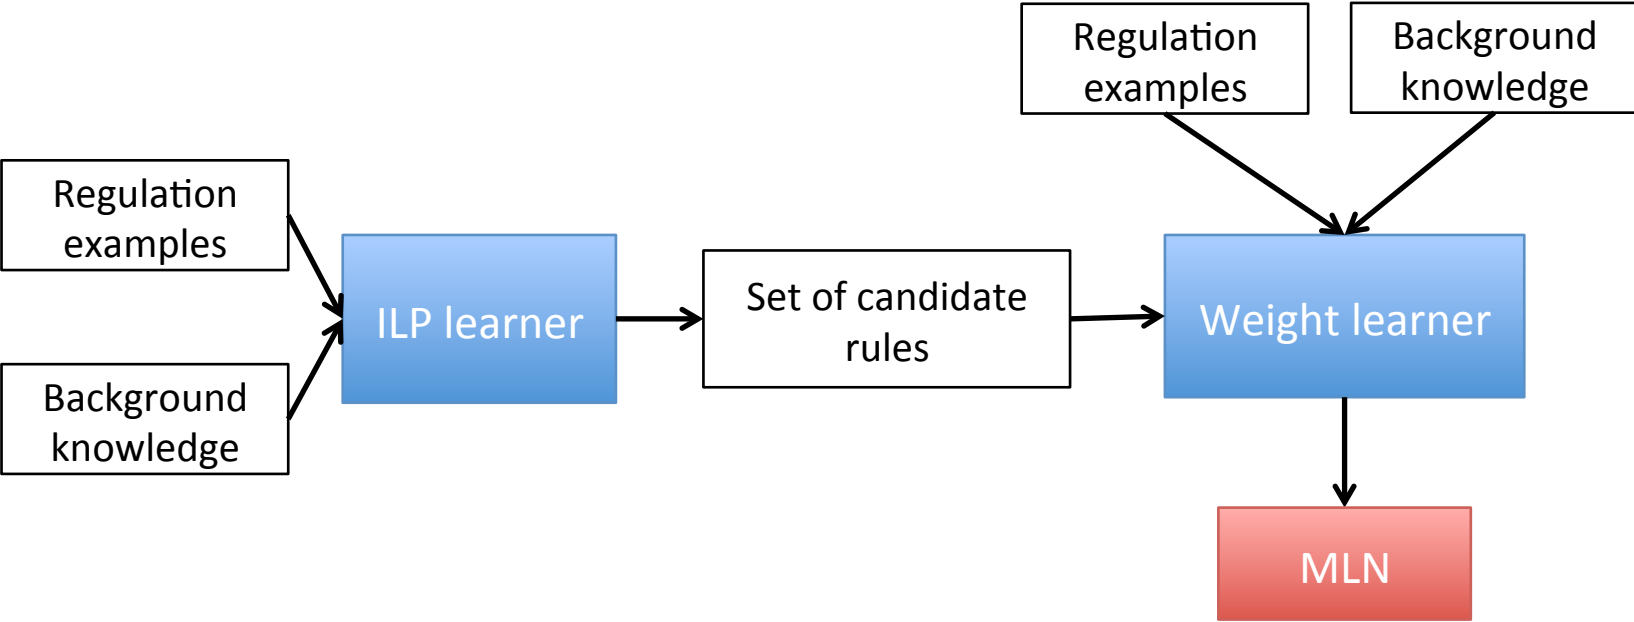

Supplement: 12859_2012_6054_MOESM6_ESM.pdf [file 12859_2012_6054_MOESM6_ESM.pdf]
